# Supplementary material
Source: Springer Nature journal article supplement (https://www.springerprofessional.de/resource/supplementary/13173_2013_3_MOESM1_ESM.pdf/11897022)

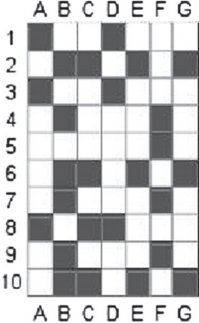

**a**

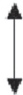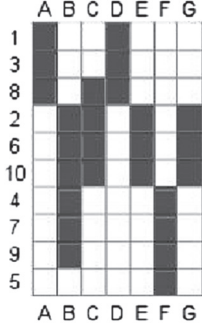

**b**

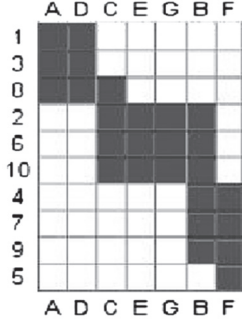

**c**

Supplement: MOESM1 [file 11897022]
